# Supplementary material for: The Impact of Escherichia coli Probiotic Strain O83:K24:H31 on the Maturation of Dendritic Cells and Immunoregulatory Functions In Vitro and In Vivo
Source: MDPI journal article supplement (doi:10.3390/cells11101624), 2022-05-12
Supplement: s1 [file s1]

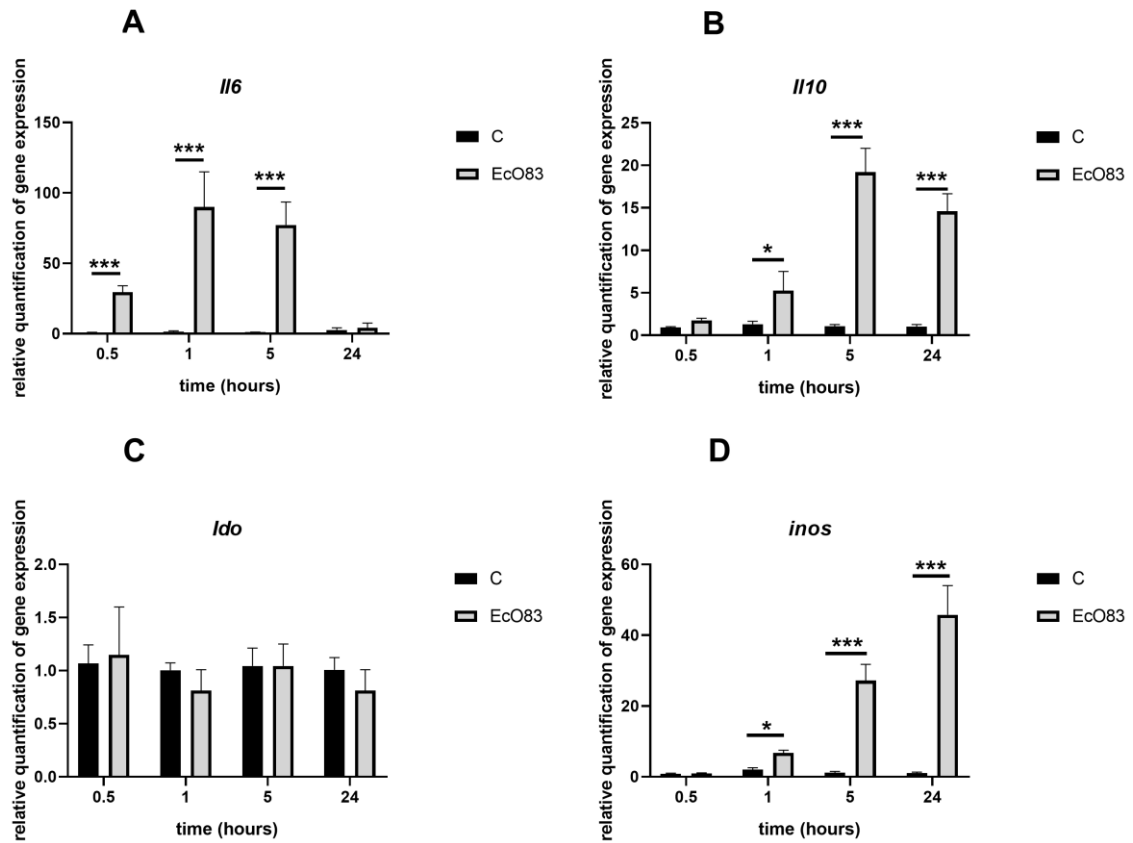

**Figure S1.** The effect of the duration of stimulation on gene expression of target genes. Bone marrow-derived dendritic cells were stimulated with *Escherichia coli* O83:K24:H31 for 0.5; 1; 5 and 24 hrs followed by measurement of gene expression of *Il6* (A), *Il10* (B), indol amine 2,3 dioxygenase (*Ido*) (C) and inducible NO synthase (*inos*) (D) by quantitative real-time PCR. Columns represent mean and standard error mean of 5 independent experiments. \*  $p \leq 0.05$ , \*\*\*  $p \leq 0.001$ .

C – non-stimulated control bone marrow-derived dendritic cells (BMDC);

EcO83 – BMDC stimulated with *Escherichia coli* O83:K24:H31 in the ratio 10:1 (i.e. 10 bacterial cells:1 BMDC).

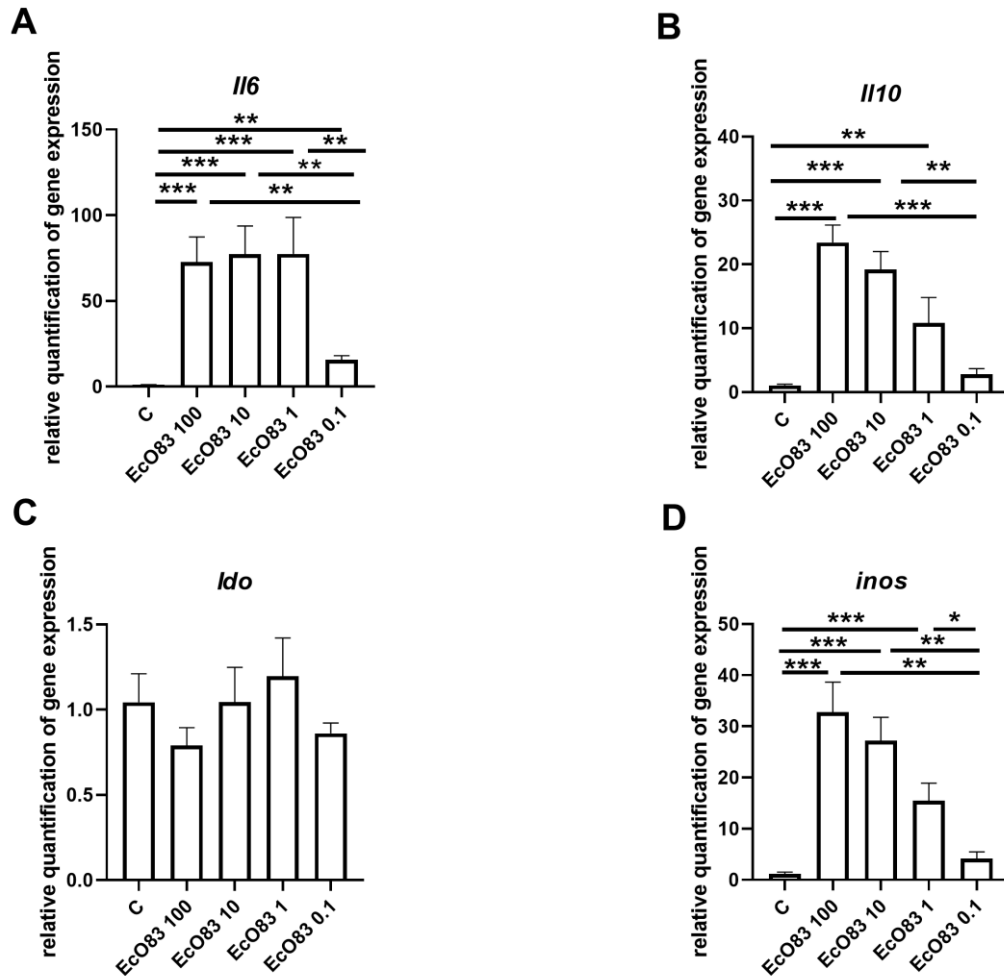

**Figure S2.** The effect of different bacteria : cell ratios on gene expression of target genes in bone marrow-derived dendritic cells. Gene expression of *Il6* (A), *Il10* (B), indol amine 2,3 dioxygenase (*Ido*) (C) and inducible NO synthase (*inos*) (D) was determined after 5 h stimulation. Columns represent mean and standard error mean of 5 independent experiments. \*  $p \leq 0.05$ , \*\*  $p \leq 0.01$ , \*\*\*  $p \leq 0.001$ .

C – non-stimulated control bone marrow-derived dendritic cells (BMDC); EcO83 100 – BMDC stimulated with *Escherichia coli* O83:K24:H31 in the ratio 1:100 (i.e. 1 BMDC : 100 bacterial cells); EcO83 10 – BMDC stimulated with *Escherichia coli* O83:K24:H31 in the ratio 1:10 (i.e. 1 BMDC : 10 bacterial cells); EcO83 1 – BMDC stimulated with *Escherichia coli* O83:K24:H31 in the ratio 1:1 (i.e. 1 BMDC : 1 bacterial cell); EcO83 0.1 – BMDC stimulated with *Escherichia coli* O83:K24:H31 in the ratio 10:1 (i.e. 10 BMDC:1 bacterial cell)

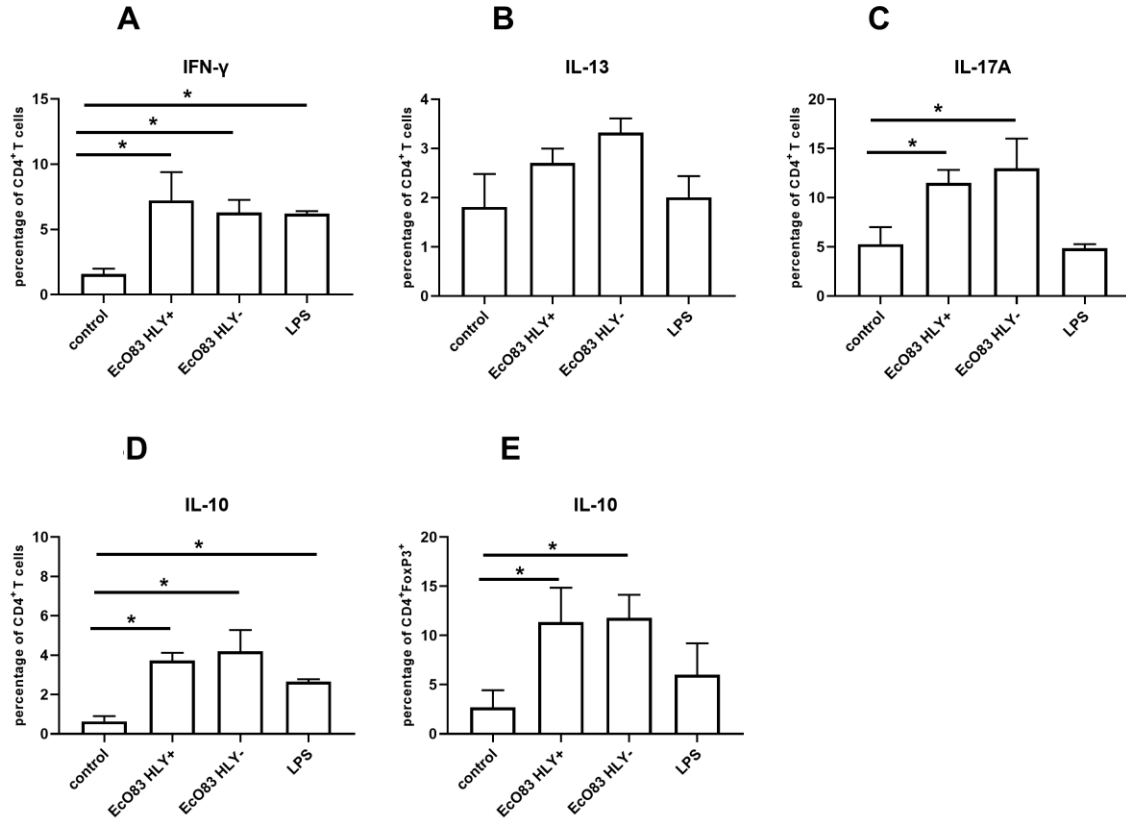

**Figure S3.** The capacity of hemolysin positive (HLY<sup>+</sup>) and hemolysin negative (HLY<sup>-</sup>) strains of *Escherichia coli* O83:K24:H31 (Eco83) primed bone marrow-derived dendritic cells (BMDC) to induce particular subsets of CD4<sup>+</sup>T cells detected by flow cytometry. Intracellular presence of IFN- $\gamma$ , (A), IL-13 (B), IL-17A (C) and IL-10 (D) in CD4<sup>+</sup>T cells was detected by flow cytometry. The capacity of Eco83 to promote IL-10 in regulatory T cells (CD4<sup>+</sup>FoxP3<sup>+</sup> cells) was evaluated as well, (E) Columns represent mean and standard error mean of 3 independent experiments. \*  $p \leq 0.05$ .

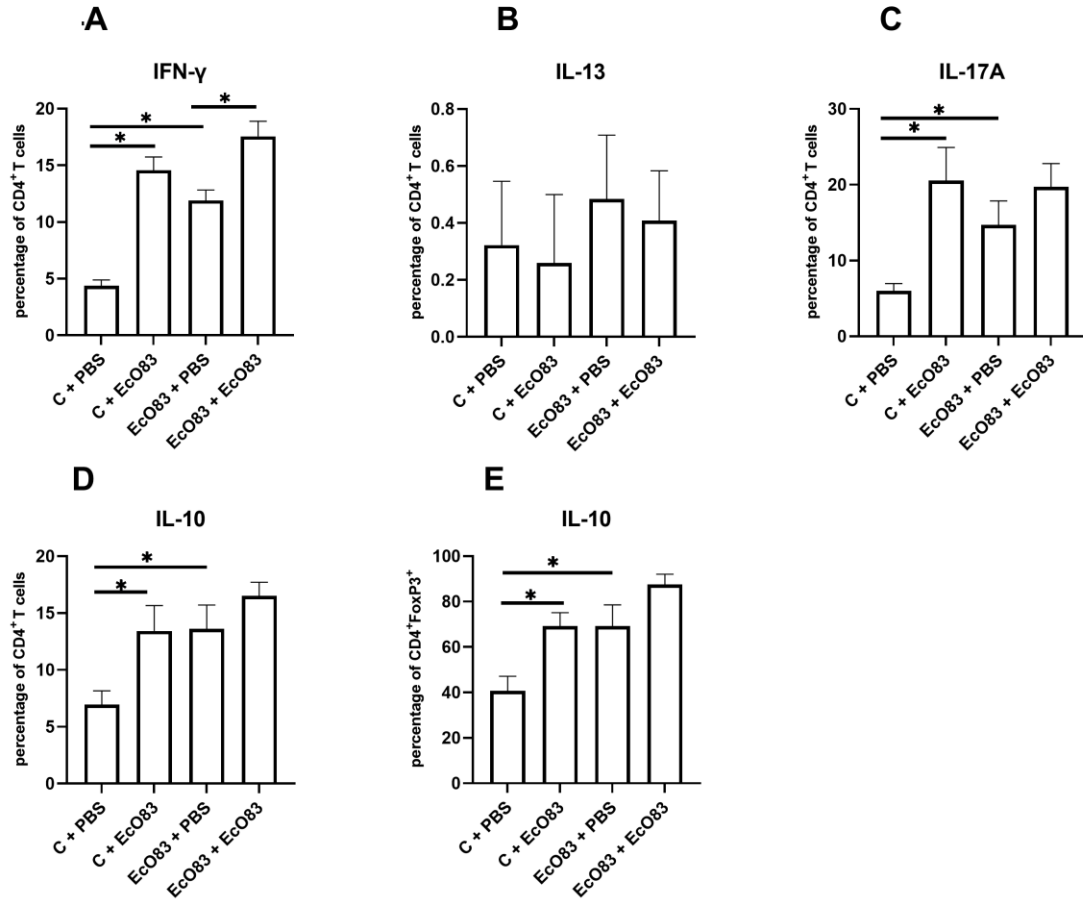

**Figure S4.** The capacity of hemolysin positive (HLY+) *Escherichia coli* O83:K24:H31 (EcO83) primed dendritic cells (DC) isolated from mouse intestine to polarize particular subpopulations of CD4<sup>+</sup>T cells. Intracellular presence of IFN- $\gamma$ , (A), IL-13 (B), IL-17A (C) and IL-10 (D) in CD4<sup>+</sup>T cells was detected by flow cytometry. The impact of EcO83 primed DC on functional capacity of regulatory T cells was estimated according to the intracellular presence of IL-10, (E) Columns represent mean and standard error mean of 3 independent experiments. \*  $p \leq 0.05$

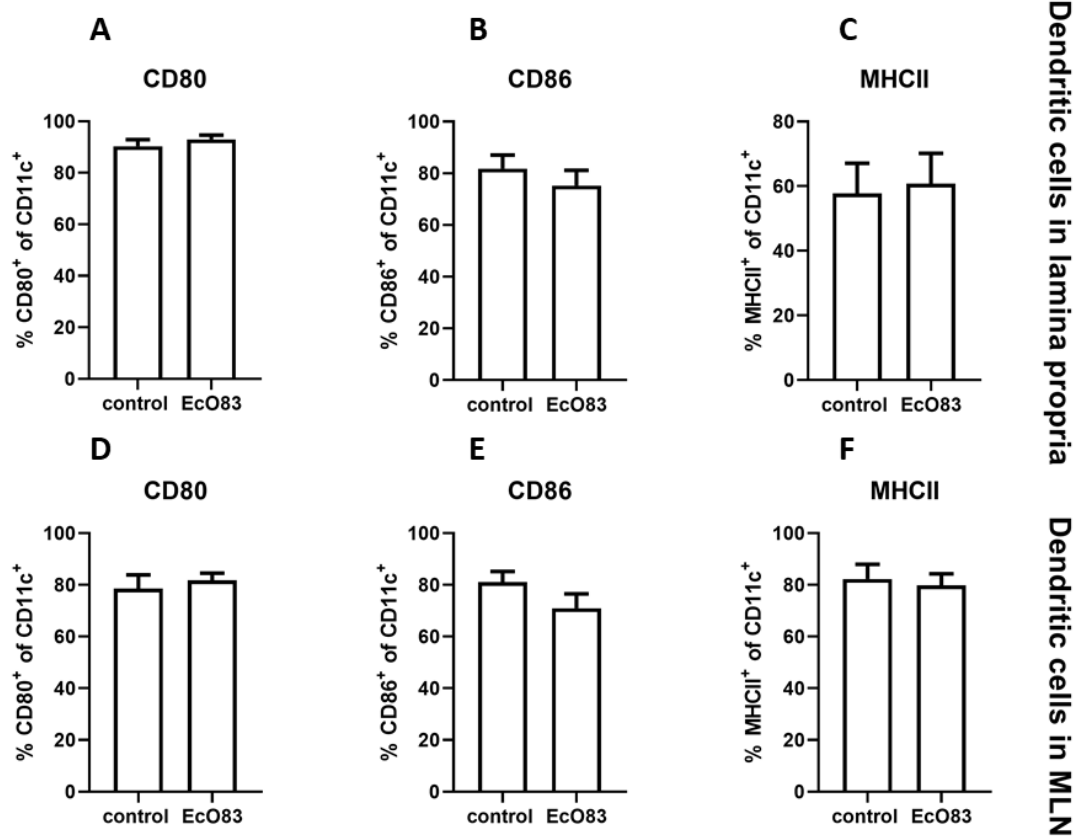

**Figure S5.** The impact of early postnatal administration of probiotic strain *Escherichia coli* O83:K24:H31 (EcO83) on maturation status of dendritic cells determined by flow cytometry. Cell surface presence of activation markers on dendritic cells in lamina propria (A–C) and mesenteric lymph node (MLN) (D–F). Columns represent mean with standard error mean from three independent experiments (4 mice per group per experiment).

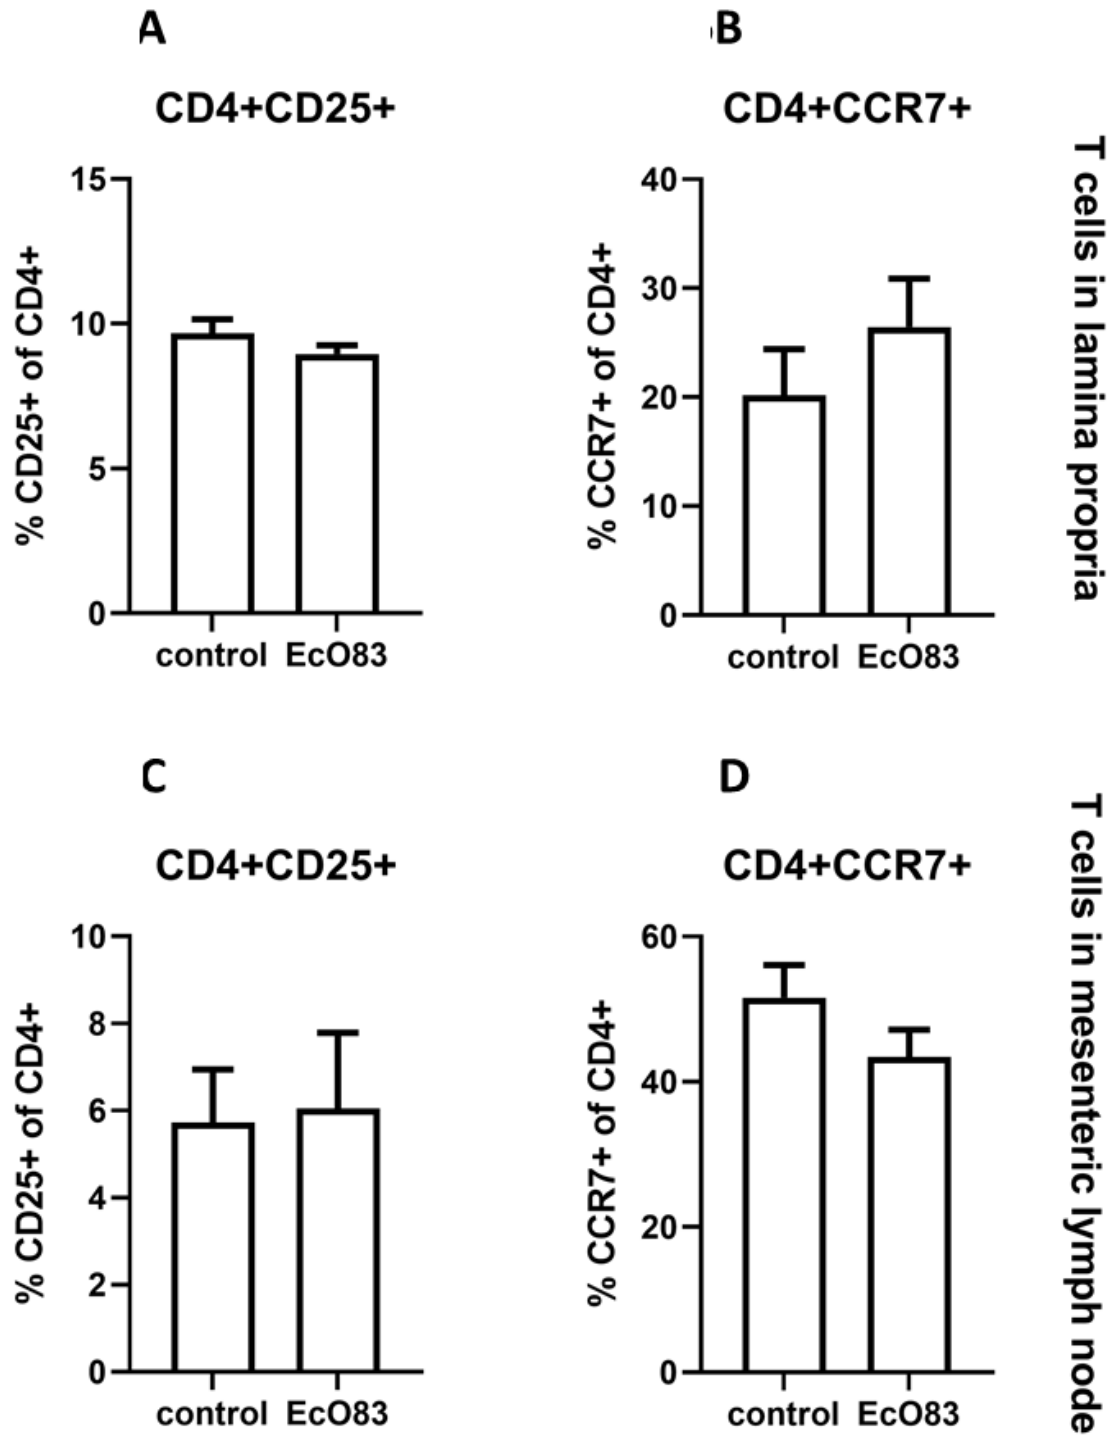

**Figure S6.** The impact of early postnatal EcO83 administration on T cells. Changes in proportion of Treg (CD4<sup>+</sup>CD25<sup>+</sup>) and CCR7<sup>+</sup> T cells in gut lamina propria of control and EcO83 treated mice, (A) and (B), respectively. Proportion of Treg and CCR7<sup>+</sup> T cells in mesenteric lymph node of control and EcO83 supplemented mice, (C) and (D), respectively.
